# Supplementary material for: Muscle Activation in Traditional and Experimental Barbell Bench Press Exercise: A Potential New Tool for Fitness Maintenance
Source: PubMed Central journal article supplement (PMC6835758; doi:10.3390/sports7100224), 2019-10-17
Supplement: sports-07-00224-s001.pdf [file sports-07-00224-s001.pdf]

Article

# Muscle Activation in Traditional and Experimental Barbell Bench Press Exercise: A Potential New Tool for Fitness Maintenance

Andrea Melani <sup>^1</sup>, Giuliana Gobbi <sup>^2,3</sup>, Daniela Galli <sup>\*2,3</sup>, Cecilia Carubbi <sup>3</sup>, Elena Masselli <sup>3</sup>, Luca Maria Neri <sup>4</sup>, Gaspare Giovinco <sup>5</sup>, Antonio Cicchella <sup>6</sup>, Laura Galuppo <sup>7</sup>, Valentina Presta <sup>7</sup>, Mauro Vaccarezza <sup>8,9</sup>, Marco Vitale <sup>2,3</sup> and Prisco Mirandola <sup>2,3</sup>

<sup>1</sup> PhD program in “Systems, technologies and devices for movement and health” at the University of Cassino and Southern Lazio, Cassino 03043, Italy; andreamelani@gmail.com

<sup>2</sup> Sport and Exercise Medicine Centre (SEM), Department of Medicine and Surgery, University of Parma, 43125 Parma, Italy; giuliana.gobbi@unipr.it (G.G.); marco.vitale@unipr.it (M.V.); prisco.mirandola@unipr.it (P.M.)

<sup>3</sup> Unit SBiBiT (Biomedical, Biotechnological and Translational Sciences), Department of Medicine and Surgery, University of Parma, 43125 Parma, Italy; cecilia.carubbi@unipr.it (C.C.); elena.masselli@unipr.it (E.M.)

<sup>4</sup> Anatomy and Histology section, Department of Morphology and Experimental Medicine and Surgery, University of Ferrara, 44121 Ferrara, Italy; Lumane265@gmail.com

<sup>5</sup> Department of Civil and Mechanical Engineering, University of Cassino and Southern Lazio, Cassino 03043, Italy; andya8380@gmail.com

<sup>6</sup> Department for Life Quality Studies, University of Bologna, Bologna 40126, Italy; antonio.cicchella@unibo.it

<sup>7</sup> PhD program in “Molecular Medicine” at the University of Parma, 43125 Parma, Italy; laura.galuppo@studenti.unipr.it (L.G.); valentina.presta@unipr.it (V.P.)

<sup>8</sup> Department of Human, Social and Health Sciences, University of Cassino and Southern Lazio, Cassino 03043, Italy; mauro.vaccarezza@curtin.edu.au

<sup>9</sup> School of Pharmacy and Biomedical Sciences, Faculty of Health Sciences, Curtin University, Bentley, Perth 6102, Western Australia, Australia.

\* Correspondence: daniela.galli@unipr.it; Tel.: +39 0521 906306; Fax: +39 0521 033039

<sup>^</sup> Equally contributed, first author

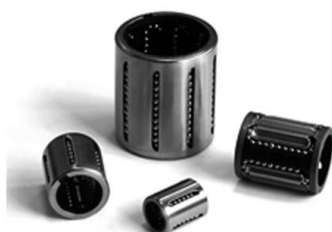

**Figure S1.** The anti-rolling device of the handles. Ball bearings embedded in semicircular milling in the longitudinal direction.

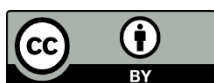

© 2019 by the authors. Submitted for possible open access publication under the terms and conditions of the Creative Commons Attribution (CC BY) license (<http://creativecommons.org/licenses/by/4.0/>).
